# Supplementary material for: Influence of the hydrophilic–hydrophobic contrast of porous surfaces on the enzymatic performance
Source: Royal Society of Chemistry journal article supplement (doi:10.1039/c4tb01700e), 2015-01-01
Supplement: c4tb01700e1.pdf [file c4tb01700e1.pdf]

## Supplementary information

# Influence of the hydrophilic-hydrophobic contrast of porous surfaces on the enzymatic performance

*Dorothee I. Fried, Dawid Bednarski, Michael Dreifke, Matthias Thommes, Michael Fröba\**

## 1. Characterization of MCF

### 1.1 Sorption results

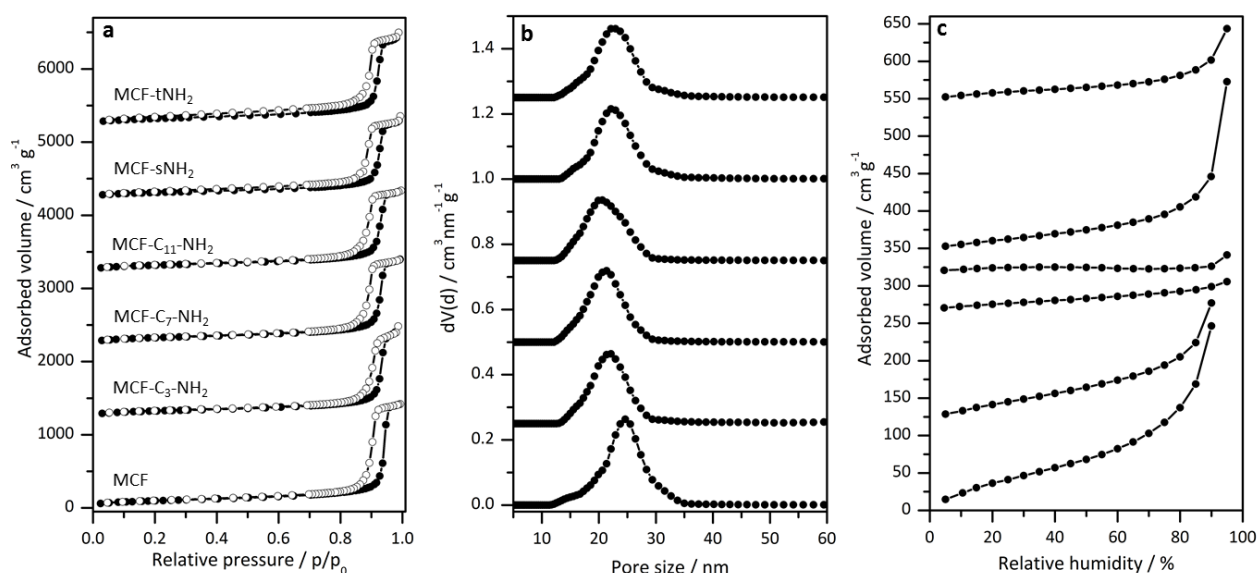

**Figure S1** Nitrogen physisorption isotherms (77 K, **a**, shift: 11250, 2250, 3250, 4250, 5250 cm<sup>3</sup> g<sup>-1</sup>) with their corresponding NLDFT (kernel: cylindrical pores, adsorption) pore size distributions (**b**, shift: 0.25, 0.5, 0.75, 1.0, 1.25 cm<sup>3</sup> (nm g<sup>-1</sup>)). Water vapour adsorption isotherms (**c**) at 298 K are shown on the right side and are shifted by 120, 270, 320, 350 and 550 cm<sup>3</sup> g<sup>-1</sup> for the respective MCF samples.

## 1.2 IR spectra

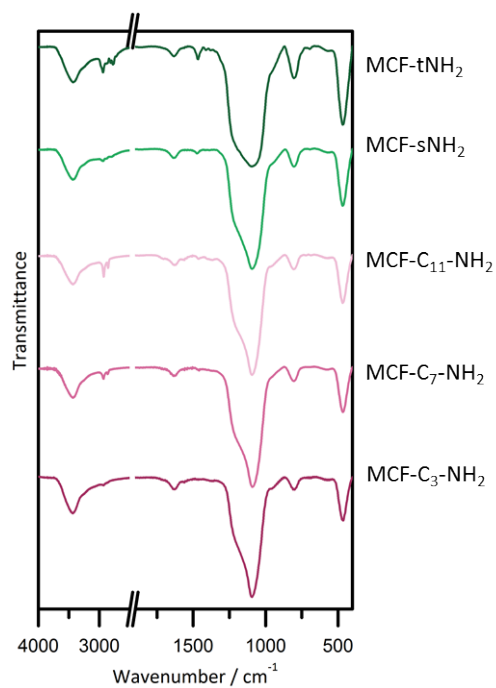

**Figure S2** Normalized IR spectra of amine-modified MCFs. Most of the vibrations can be assigned to the silica network whereas some weaker bands indicate the presence of the organic moieties attached to the walls of the MCF.

| Sample                                                                                                                                | Wavenumber / $\text{cm}^{-1}$ | Vibration                                                               |
|---------------------------------------------------------------------------------------------------------------------------------------|-------------------------------|-------------------------------------------------------------------------|
| MCF-C <sub>3</sub> /C <sub>7</sub> /C <sub>11</sub> -NH <sub>2</sub>                                                                  | 2930                          | $\nu_{as}$ (CH <sub>2</sub> )                                           |
|                                                                                                                                       | 2865                          | $\nu_s$ (CH <sub>2</sub> )                                              |
| MCF-s/tNH <sub>2</sub>                                                                                                                | 2941                          | $\nu_{as}$ (CH <sub>2</sub> ), $\nu_{as}$ (CH <sub>3</sub> ) overlapped |
|                                                                                                                                       | 2870                          | $\nu_s$ (CH <sub>2</sub> ), $\nu_s$ (CH <sub>3</sub> ) overlapped       |
|                                                                                                                                       | 2815                          | $\nu_s$ (CH <sub>2</sub> )                                              |
|                                                                                                                                       | 1467                          | $\delta_{as}$ (CH <sub>3</sub> )                                        |
|                                                                                                                                       | 1411 <sup>a</sup>             | $\delta_s$ (CH <sub>3</sub> )                                           |
|                                                                                                                                       | 1377 <sup>a</sup>             | $\delta_s$ (CH <sub>3</sub> )                                           |
| $\nu_{as}$ : asymmetric stretching, $\nu_s$ : symmetric stretching, $\delta$ : deformation, a: only observed for MCF-tNH <sub>2</sub> |                               |                                                                         |

### 1.3 Argon physisorption (87 K)

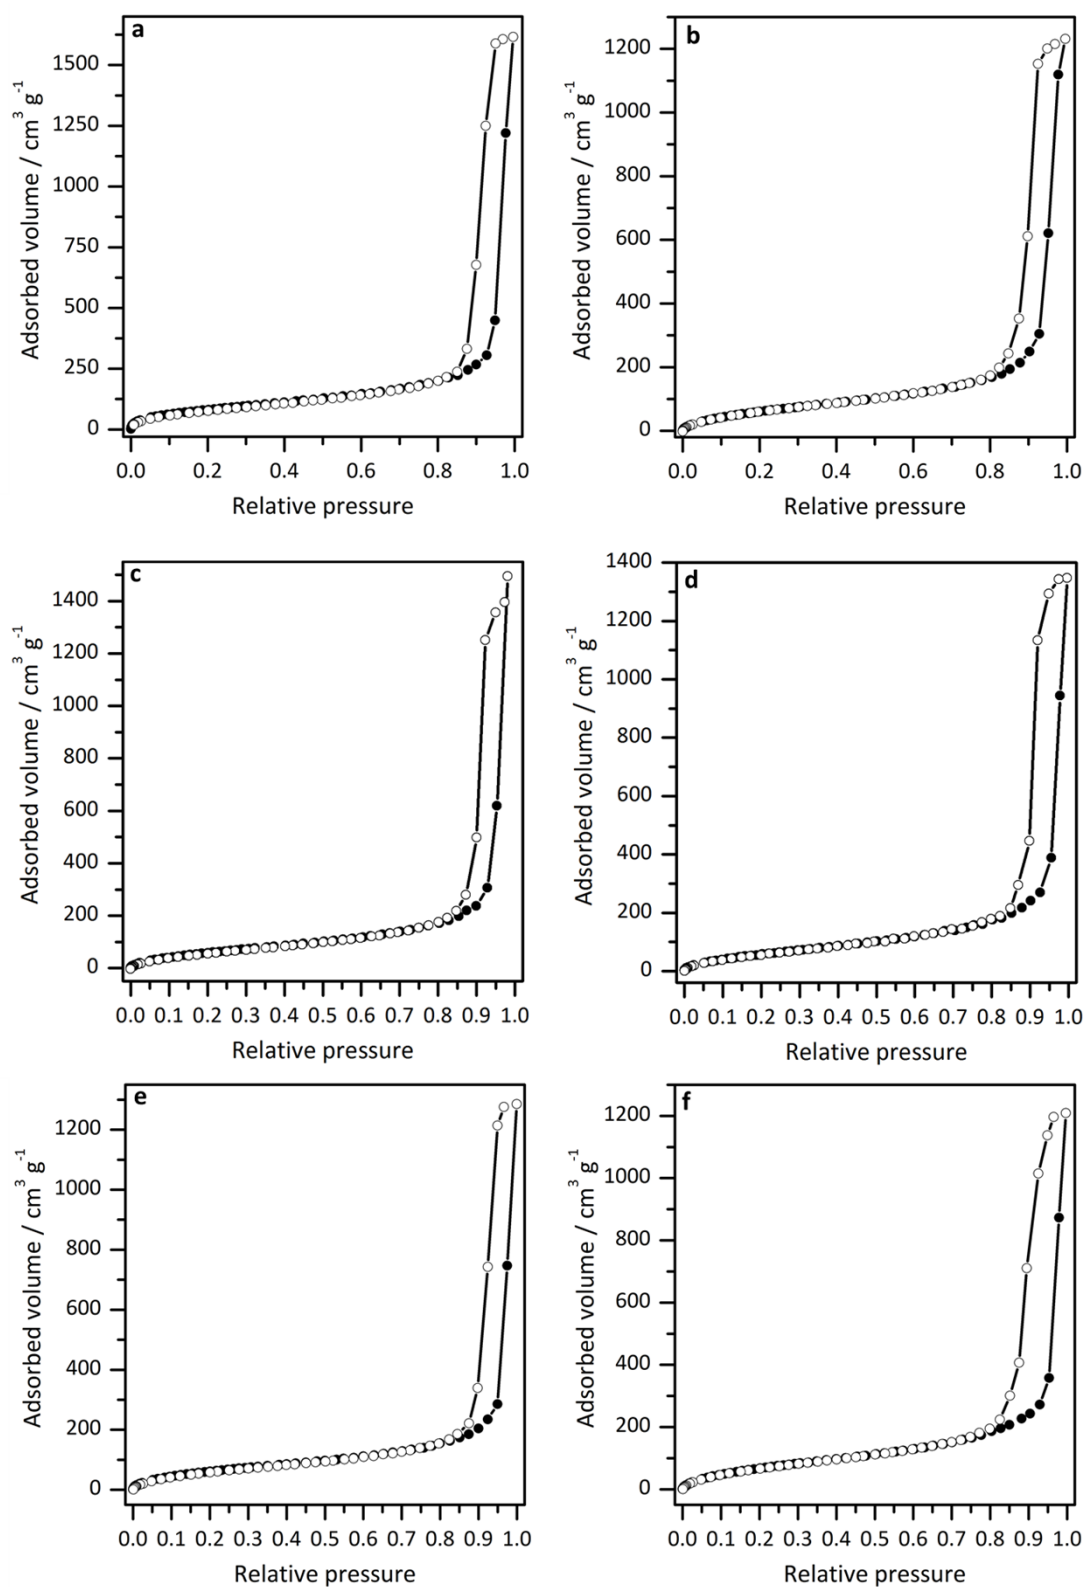

**Figure S3** Argon physisorption isotherms at 87 K of pure MCF (a), MCF-C<sub>11</sub>-NH<sub>2</sub> (b), MCF-sNH<sub>2</sub> (c), MCF-tNH<sub>2</sub>(d), MCF-C<sub>3</sub>-NH<sub>2</sub> (e) and MCF-C<sub>7</sub>-NH<sub>2</sub> (f).

#### 1.4 Quantification of the hydrophobicity

$$n_m = \frac{S_{BET} M}{N_A a_m}$$

$n_m$ : monolayer capacity

$S_{BET}$ : specific surface area

➤  $S_{BET} (Ar)$ : determination of the maximum theoretical  $n_m$

➤  $S_{BET} (H_2O)$ : experimental  $n_m$

$M$ : molecular weight of water (18.015 g mol<sup>-1</sup>)

$N_A$ : Avogadro's number

$a_m$ : cross-sectional area of water (10.5 Å<sup>2</sup>)

Hydrophilicity index  $\chi$ :

$$\chi = \frac{n_m(H_2O)}{n_m(Ar)}$$

Values determined from Argon and water sorption to calculate  $\chi_1$  and  $\chi_2$ :

| Sample                               | $S_{BET} (Ar) /$<br>$m^2 g^{-1}$ | $S_{BET} (H_2O) /$<br>$m^2 g^{-1}$ | $V (Ar)$<br>$/cm^3 g^{-1}$ | $V (H_2O)$<br>$/cm^3 g^{-1}$ |
|--------------------------------------|----------------------------------|------------------------------------|----------------------------|------------------------------|
| MCF                                  | 278                              | 114                                | 0.789 <sup>a</sup>         | 0.179 <sup>a</sup>           |
| MCF-C <sub>3</sub> -NH <sub>2</sub>  | 224                              | 76                                 | 0.261 <sup>a</sup>         | 0.126 <sup>a</sup>           |
| MCF-C <sub>7</sub> -NH <sub>2</sub>  | 255                              | 30                                 | 0.455                      | 0.029                        |
| MCF-C <sub>11</sub> -NH <sub>2</sub> | 234                              | 14                                 | 0.791                      | 0.017                        |
| MCF-sNH <sub>2</sub>                 | 225                              | 48                                 | 0.789                      | 0.179                        |
| MCF-tNH <sub>2</sub>                 | 223                              | 32                                 | 0.494                      | 0.075                        |

a: Values determined at  $p/p_0 = 0.90$ . All other volumes were determined at  $p/p_0 = 0.95$ .

1.5 TG/DTA/MS

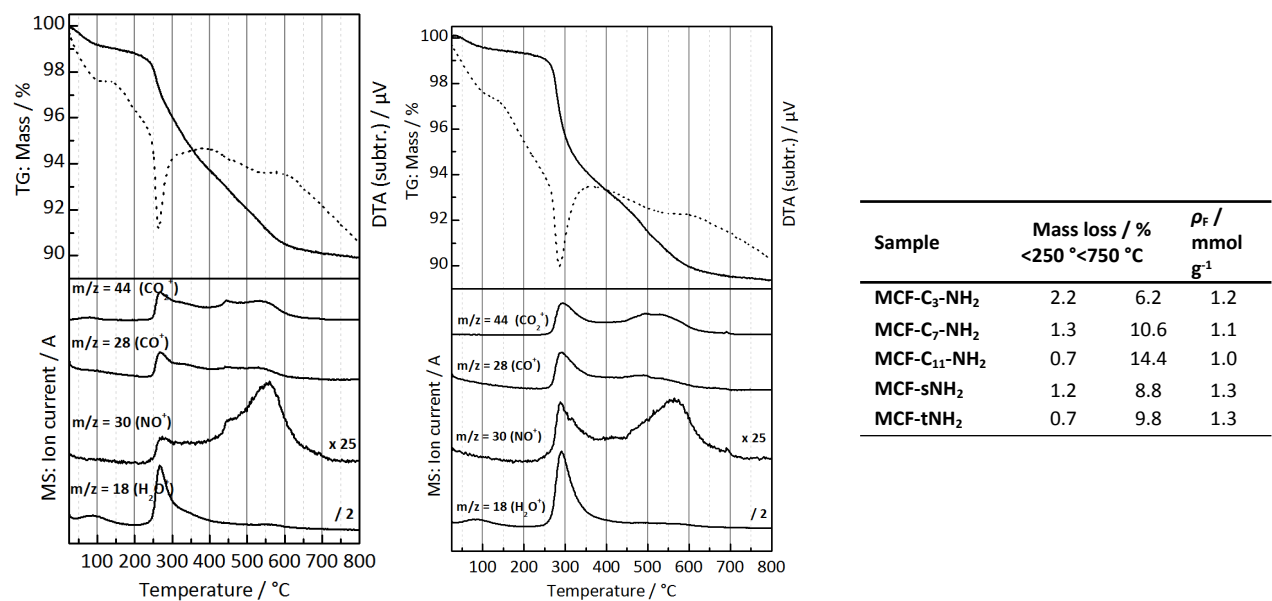

**Figure S4** TG/MS/DTA of MCF-sNH<sub>2</sub> (left) and MCF-tNH<sub>2</sub> (right) under synthetic air. The diagram at the top shows the TG (solid line) and DTA (dotted line) curves whereas the ion currents detected by a mass spectrometer are depicted at the bottom of each diagram.

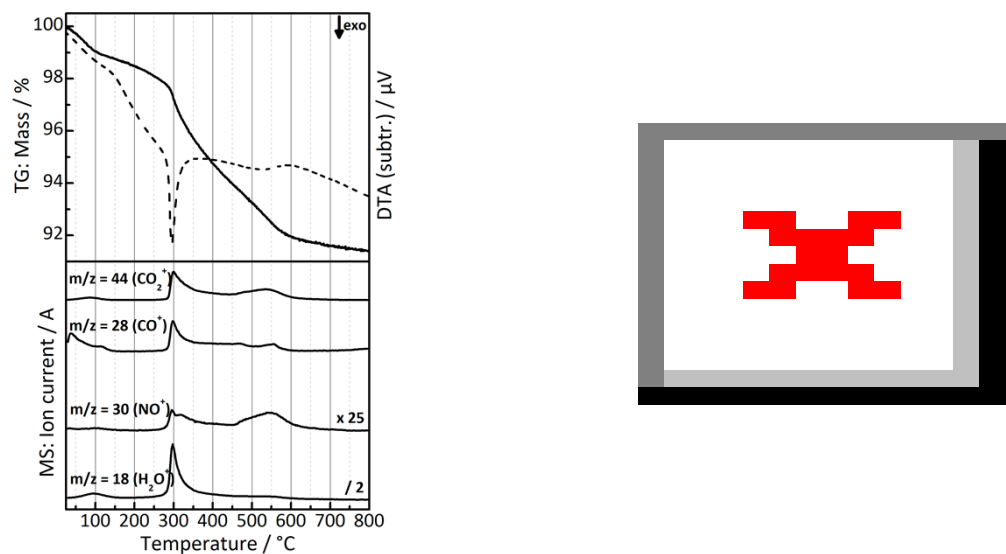

**Figure S5** TG/MS/DTA of MCF-C<sub>3</sub>-NH<sub>2</sub> (left), MCF-C<sub>7</sub>-NH<sub>2</sub> (middle) and MCF-C<sub>11</sub>-NH<sub>2</sub> (right) under synthetic air. The diagram at the top shows the TG (solid line) and DTA (dotted line) curves whereas the ion currents detected by a mass spectrometer are depicted at the bottom of each diagram.

Calculation of the functionalization density:

$$\frac{m(\text{functionalization per g material})}{M(\text{organic residue})} = \delta_F$$

$$\delta_F \cdot (100 - \text{mass loss}(\%)) = \delta_F / \text{g Silica}$$

## 2. Biochemical characterization

### 2.1 G6PDH uptake

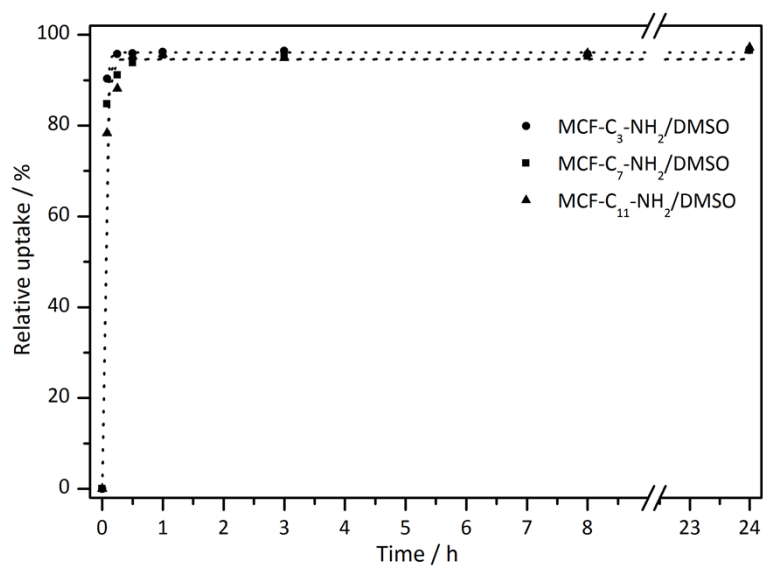

**Figure S6** Uptake curves (addition of DMSO) for the immobilization of G6PDH onto amine-modified supports with varied spacer chain length.

### 2.2 NADP<sup>+</sup> uptake – Calibration curve

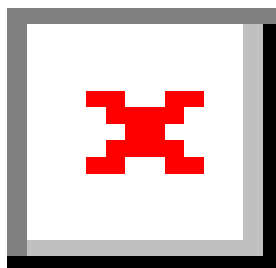

**Figure S7** Calibration curve for various NADP<sup>+</sup> concentrations. Therefore NADP<sup>+</sup> was converted by G6PDH with addition of G6P to measure the adsorption of NADPH.

### 2.3 Storage stability of immobilized G6PDH at 4 °C

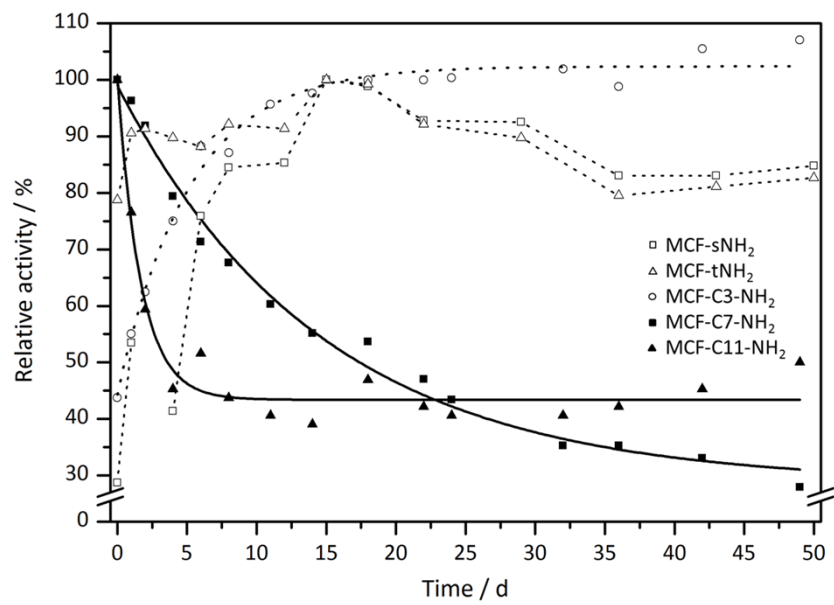

**Figure S8** Storage stability of immobilized G6PDH samples at 4 °C.
